# Supplementary material for: miR-491-5p-induced apoptosis in ovarian carcinoma depends on the direct inhibition of both BCL-XL and EGFR leading to BIM activation
Source: PubMed Central journal article supplement (PMC4649504; doi:10.1038/cddis.2014.389), 2014-10-09
Supplement: cddis2014389x1.pdf [file cddis2014389x1.pdf]

## Computational predictions

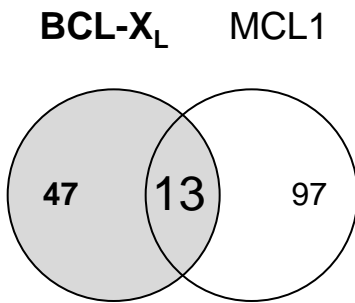

TargetScan 5.1  
(<http://www.targetscan.org/>)

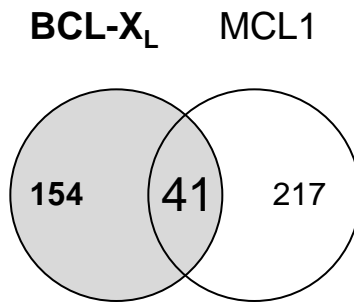

miRanda  
(<http://www.microrna.org/>)

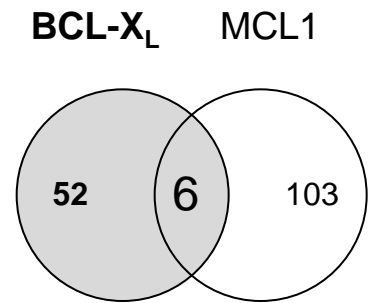

DIANA - microT v3.0  
(<http://diana.cslab.ece.ntua.gr/>)

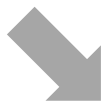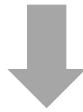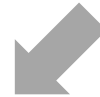

### 11 putative miRNAs

(intersection between at least two algorithms)

#### hsa-miR-:

17-5p, 32, 96, 133a, 133b, 182,  
193b, 204, 214, **491-5p**, 504
