# Supplementary material for: miR-491-5p-induced apoptosis in ovarian carcinoma depends on the direct inhibition of both BCL-XL and EGFR leading to BIM activation
Source: PubMed Central journal article supplement (PMC4649504; doi:10.1038/cddis.2014.389), 2014-10-09

**a**

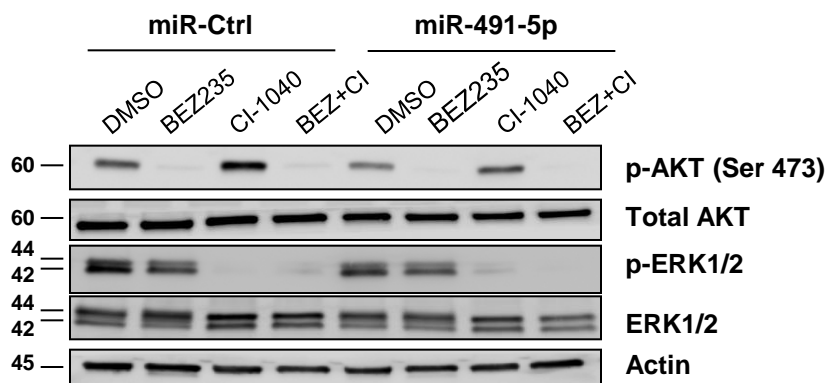

**b**

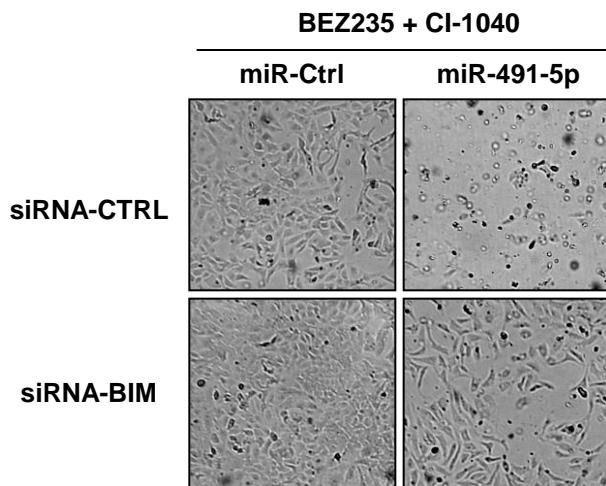

Supplement: cddis2014389x6.pdf [file cddis2014389x6.pdf]
