# Supplementary material for: miR-491-5p-induced apoptosis in ovarian carcinoma depends on the direct inhibition of both BCL-XL and EGFR leading to BIM activation
Source: PubMed Central journal article supplement (PMC4649504; doi:10.1038/cddis.2014.389), 2014-10-09
Supplement: cddis2014389x9.pdf [file cddis2014389x9.pdf]

| <b>3'UTR</b>             | <b>Primers for amplification</b>                                                                          | <b>RE binding sites<br/>(underlined)</b> |
|--------------------------|-----------------------------------------------------------------------------------------------------------|------------------------------------------|
| <b>BCL-X<sub>L</sub></b> | for: 5'-cg <u>acgcgt</u> ccagacactgacatc-3'<br>rev: 5'- <u>ccaagctt</u> ctgaactgcactttcac-3'              | <i>Mlu</i><br><i>HindIII</i>             |
| <b>EGFR</b>              | for: 5'-cc <u>actagt</u> gcatgaccacggaggatagt-3'<br>rev : 5'- <u>cacgcgt</u> atcttcattgagacaaaaatcaaat-3' | <i>SpeI</i><br><i>Mlu</i>                |

| <b>Mutant name</b>     | <b>Primers for miR-491-5p site deletion</b>                                                          | <b>matrixes</b>      |
|------------------------|------------------------------------------------------------------------------------------------------|----------------------|
| pMIR-XLDel1/3'UTRLuc   | for: 5'-gctagtttctagaattatcctcagttccttggcctc-3'<br>rev: 5'-gaggccaaggaactgaggataaattctagaaaactagc-3' | pMIR-XL/3'UTRLuc     |
| pMIR-XLDel2/3'UTRLuc   | for: 5'-agggaaccagggttagaatgatcaattctgaggcc-3'<br>rev: 5'-ggcctcagaattgatcattctaactgggttcct-3'       | pMIR-XL/3'UTRLuc     |
| pMIR-XLDel1.2/3'UTRLuc | for: 5'-agggaaccagggttagaatgatcaattctgaggcc-3'<br>rev: 5'-ggcctcagaattgatcattctaactgggttcct-3'       | pMIR-XLDel1/3'UTRLuc |
| pMIR-EGFRDel/3'UTR     | for: 5'-gaagaaacggaggggatggaattctagactgactgtt-3'<br>rev: 5'-acaagtcagtctagaattccatcccctccgtttcttc-3' | pMIR-EGFR/3'UTRLuc   |
